# Supplementary material
Source: PubMed Central journal article supplement (PMC6974221)
Supplement: 41997_2010_BF03405619_MOESM1_ESM.pdf [file 41997_2010_BF03405619_MOESM1_ESM.pdf]

# Politiques visant à favoriser une saine alimentation dans les écoles

Mary L. McKenna, Ph.D., RD

## RÉSUMÉ

**Objectifs :** Les politiques de nutrition en milieu scolaire sont une stratégie prometteuse en matière de promotion de la saine alimentation et de réduction du risque de maladies chroniques. Le présent article examine les composantes de ces politiques qui peuvent favoriser une saine alimentation. Après avoir examiné leurs fondements scientifiques, il propose des orientations en vue de recherches ultérieures.

**Méthodologie :** Les informations présentées dans cet article proviennent de recherches ou d'autres documents publiés en anglais entre 1994 et 2008. En nous inspirant des recommandations de l'Organisation mondiale de la Santé, nous avons identifié et examiné certains éléments d'information entourant cinq composantes potentielles des politiques de nutrition, à savoir : aliments disponibles, environnement alimentaire, éducation en santé, services de santé et de consultation, et sensibilisation des familles et de la collectivité. Nous avons évalué certaines initiatives d'éducation en nutrition en tant qu'interventions dans le cadre de certains programmes, mais non en tant qu'éléments de ces politiques.

**Résultats :** Le nombre limité d'études qui ont évalué l'impact des normes nutritionnelles en vigueur dans les écoles ont révélé l'impact positif de celles-ci sur la disponibilité des aliments et l'apport nutritionnel des élèves. Les résultats démontrent que l'éducation en nutrition axée sur le comportement, surtout lorsqu'elle est combinée à des services alimentaires et à d'autres initiatives, peut avoir un impact positif sur les habitudes alimentaires des élèves, sans nécessairement réduire le taux d'obésité. On dispose de peu ou pas de données probantes quant aux autres sous-composantes potentielles des politiques de nutrition, notamment la restriction du marketing alimentaire dans les écoles, la coordination de tous les services alimentaires et l'offre de services de santé en matière de nutrition.

**Conclusion :** En théorie, les politiques globales de nutrition en milieu scolaire qui incluent les cinq composantes stratégiques déjà mentionnées s'inscrivent dans le cadre d'une approche intégrée et holistique de la nutrition dans les écoles. Ces politiques pourraient orienter l'ensemble des mesures entreprises dans les écoles en matière de nutrition et servir en même temps de cadre de responsabilisation. Peut-on affirmer que la théorie correspond à la réalité ? De nouvelles recherches s'imposent pour vérifier l'impact de chacune des composantes de ces politiques sur leur mise en œuvre et leurs résultats.

**Mots clés :** santé publique; éducation; promotion de la santé; nutrition; politique; écoles

Au Canada, on utilise l'expression « approche globale de la santé en milieu scolaire (AGSS) » qui équivaut aux expressions *Health Promoting Schools* [écoles-santé] et *Coordinated School Health* [programme coordonné de promotion de la santé en milieu scolaire] utilisées dans d'autres administrations.<sup>1,2</sup> Les politiques de nutrition en milieu scolaire qui s'inscrivent dans le cadre de l'AGSS offrent une stratégie prometteuse pouvant réduire le risque de maladies chroniques, favoriser un poids santé et favoriser l'apprentissage des élèves.<sup>3-5</sup> Les politiques de nutrition en milieu scolaire offrent un cadre permettant aux écoles de planifier, de mettre en œuvre et d'évaluer certaines stratégies en matière de nutrition grâce à une approche coordonnée respectant les recommandations nutritionnelles en vigueur.

Dans le but de faciliter le travail des nombreuses administrations qui sont en train d'élaborer des politiques, le présent article résume les données probantes entourant les composantes potentielles des politiques intégrées de nutrition. Ces données sont organisées de la façon suivante : aliments disponibles, environnement alimentaire, éducation en santé, services de santé et de consultation et sensibilisation des familles et de la collectivité. Cet article traite également de certaines sous-composantes potentielles des politiques de nutrition, comme les normes nutritionnelles, les programmes alimentaires et les contrats alimentaires. Il propose aussi certaines orientations pour des recherches ultérieures.

## MÉTHODOLOGIE

Compte tenu du peu de données probantes disponibles, il est impossible pour le moment d'effectuer un examen systématique rigoureux des politiques de nutrition dans les écoles. Le choix des cinq composantes examinées dans le présent article s'appuie sur les recommandations des *Health Promoting Schools* (HPS) de l'Organisation mondiale de la Santé (OMS) et de la *Nutrition Friendly Schools Initiative* (NFSI). Comme le recommande la Stratégie mondiale pour l'alimentation, l'exercice physique et la santé de l'OMS, seules les composantes entourant les maladies chroniques d'origine nutritionnelle y sont incluses. Les données probantes entourant chacune des composantes de ces politiques proviennent de diverses sources : essais contrôlés randomisés, observations épidémiologiques, données probantes fondées sur la pratique et avis éclairés (p. ex. *Institute of Medicine* [IOM]). La documentation utilisée provient d'une recherche sur les politiques de nutrition en milieu scolaire (entre 1994 et 2008) effectuée à l'aide de PubMed et d'autres

### Affiliation d'auteur

Professeure, département de kinésiologie, Université du Nouveau-Brunswick, Frédéricton (Nouveau-Brunswick)

**Correspondance et demandes de réimpression :** Mary L. McKenna, Ph.D., département de kinésiologie, Université du Nouveau-Brunswick, case postale 4400, Frédéricton (Nouveau-Brunswick) E3B 5A3, Tél. : 506-451-6872, Téléc. : 506-453-3511, Courriel : mmckenna@unb.ca

**Conflit d'intérêts :** Aucun à déclarer.

documents pertinents, notamment certains rapports gouvernementaux ou non gouvernementaux. Les recherches retenues portaient à la fois sur les politiques de nutrition dans les écoles et sur chacune des composantes et sous-composantes de celles-ci. Pour évaluer la pertinence des documents publiés en anglais, nous avons examiné le modèle de recherche utilisé, la robustesse conceptuelle ainsi que la contribution de ces documents en termes de données probantes.

## Résumé de la recherche documentaire

### *Aliments disponibles dans les écoles*

#### **Normes nutritionnelles**

Les normes nutritionnelles régissent les types d'aliments offerts dans les écoles; elles sont à la base des politiques de nutrition. Certaines politiques se résument même à de simples normes nutritionnelles. De nombreux organismes, comme l'OMG<sup>6</sup> et l'IOM,<sup>7</sup> recommandent d'élaborer des normes englobant tous les aliments disponibles à l'école afin de favoriser un apport nutritionnel optimal chez les élèves. Les normes existantes à l'échelon international varient en fonction de la rigueur (p. ex. exigences strictes à l'égard des matières grasses, du sel et du sucre par opposition à des exigences plus générales) et des critères de conformité (p. ex. mise en œuvre obligatoire par opposition à mise en œuvre recommandée). En plus de spécifier certains aliments ou nutriments, les normes nutritionnelles spécifient parfois les portions, la valeur énergétique, l'accès aux aliments (p. ex. limites en fonction du lieu ou du moment) et le degré scolaire (p. ex. aliments permis aux élèves du secondaire, mais pas à ceux du primaire) (voir l'IOM<sup>8</sup> pour obtenir des exemples).

Le champ d'application des normes nutritionnelles varie considérablement. Ainsi, ces normes peuvent s'inscrire dans le cadre de lois nationales (p. ex. en Écosse) ou infranationales (p. ex. en Ontario). Elles peuvent s'appliquer à la valeur nutritive des programmes de repas et/ou à celle de tous les aliments offerts dans les écoles (p. ex. les États-Unis ont adopté des normes nationales pour les programmes de repas et des normes facultatives pour les aliments servis autrement). Un faible nombre d'évaluations des normes nutritionnelles ont révélé un impact positif sur la disponibilité des aliments et la consommation alimentaire chez les élèves.<sup>3,9,10</sup> D'autres recherches recommandent d'étendre l'application de ces normes à la préparation des aliments et à l'approvisionnement alimentaire.<sup>11</sup> Compte tenu du faible nombre de recherches disponibles, il est impossible de dégager un consensus quant aux types de normes nutritionnelles les plus efficaces.

#### **Programmes alimentaires**

Selon l'organisme Les écoles favorisant la santé (HPS), les programmes alimentaires visent à accroître la disponibilité des aliments tout en favorisant une saine alimentation.<sup>12</sup> De nombreux pays (cela n'inclut pas le Canada) ont mis en œuvre des programmes nationaux prévoyant la distribution d'un dîner ou déjeuner complet ou seulement la distribution d'aliments spécifiques, comme des fruits, des légumes ou du lait.<sup>13</sup> Des évaluations de programmes américains ont révélé que ces derniers contribuaient à l'augmentation de l'apport de certains nutriments essentiels.<sup>14</sup> L'impact minime, mais positif, des programmes de distribution de fruits et de légumes sur la consommation de ces produits a également été démontré,<sup>15,16</sup> tout

comme celui des programmes de distribution de lait.<sup>17</sup> Une recherche menée à l'Île-du-Prince-Édouard a révélé que les élèves consommaient relativement peu de repas scolaires non subventionnés.<sup>18</sup> On observe pourtant des taux de participation élevés dans les pays qui offrent des programmes universels de distribution de repas financés par l'État.<sup>13</sup> Un rapport publié en 2000<sup>19</sup> concluait que la plupart des programmes de distribution de repas du Canada ne respectaient pas les critères d'efficacité entourant les programmes sociaux. Une décennie plus tard, la nécessité se fait sentir de revoir cette question et d'examiner la relation entre les programmes de repas et les politiques de nutrition en milieu scolaire.

#### **Contrats avec des producteurs locaux d'aliments**

Il faut parfois tenir compte de certaines normes nutritionnelles dans les contrats accordés à des producteurs locaux d'aliments ou à diverses entreprises alimentaires. La Stratégie mondiale pour l'alimentation, l'exercice physique et la santé de l'OMS recommande de s'approvisionner auprès de producteurs locaux d'aliments; l'organisme Les écoles favorisant la santé (HPS) va dans le même sens.<sup>12</sup> Story et ses collaborateurs sont d'avis que le nombre croissant de programmes « de la ferme à l'école » et de « jardins scolaires » contribue efficacement à la prévention de l'obésité.<sup>20</sup> Certaines recherches indiquent qu'en offrant certains aliments locaux, comme les fruits et les légumes, on peut contribuer à une meilleure alimentation dans les écoles, tout en préservant les terres agricoles et en appuyant l'économie locale.<sup>21</sup> D'autres recherches s'avèrent nécessaires à cet égard, notamment en matière d'impact sur l'environnement.

#### **Contrats d'exclusivité**

Les contrats qui accordent aux fabricants de boissons gazeuses le privilège exclusif de vendre leurs produits dans certaines écoles font l'objet de critiques; on leur reproche de favoriser la consommation de boissons gazeuses riches en calories. Ces boissons ont été associées à une augmentation de l'apport énergétique et du poids corporel et à une diminution de l'apport de calcium.<sup>22</sup> Quelques données probantes en provenance des États-Unis indiquent que la présence de boissons gazeuses dans les écoles a un impact sur le taux de consommation des élèves.<sup>23</sup> Les principaux fabricants de boissons gazeuses des États-Unis ont convenu en 2006 d'adopter des normes visant à retirer graduellement des écoles les boissons gazeuses riches en calories avant l'année scolaire 2009-2010.<sup>24</sup> Bien que cette entente n'empêche pas la signature de contrats d'exclusivité, au début de l'année scolaire 2007-2008, les expéditions de boissons gazeuses riches en calories avaient diminué de 65 p. 100 par rapport à l'année 2004.<sup>25</sup> Boissons rafraîchissantes Canada a également convenu de retirer toutes les boissons gazeuses riches en calories des écoles canadiennes avant l'année scolaire 2009-2010.<sup>26</sup> Il est important de surveiller l'impact de ces changements et de vérifier dans quelle mesure les boissons gazeuses riches en calories ont été remplacées par d'autres types de boissons.

#### *Environnement alimentaire*

#### **Marketing des aliments et boissons**

Parmi les stratégies de marketing des aliments et boissons, mentionnons les logos et l'affichage de marques de commerce (p. ex. sur les machines distributrices), le matériel pédagogique commandité et la distribution d'échantillons gratuits.<sup>27</sup> Un certain nombre de groupes ont recommandé l'élimination du marketing des ali-

ments dans les écoles,<sup>28</sup> tandis que d'autres ont recommandé l'adoption de politiques de marketing favorisant une saine alimentation.<sup>29</sup> Bien que l'insuffisance de données probantes ne permette pas d'identifier la stratégie de marketing pouvant s'avérer la plus efficace, une recherche menée aux États-Unis a révélé que les écoles pourraient avoir recours à une stratégie de réduction des prix pour favoriser les achats de produits plus sains.<sup>30</sup>

### **Disponibilité des aliments à proximité des écoles**

Selon l'organisme Les écoles favorisant la santé (HPS), les écoles devraient collaborer avec les commerçants environnants pour que ceux-ci offrent des produits alimentaires favorisant la santé.<sup>12</sup> En l'absence de politique à cet égard, un plus grand nombre de restaurants rapides (*fast food*) s'installent parfois à proximité des écoles, tandis qu'on retrouve un nombre relativement faible d'épicerie qui vendent des fruits et des légumes.<sup>31</sup> Aux États-Unis, on a constaté que le taux de participation des élèves à des programmes de repas scolaires était plus élevé lorsque certaines politiques interdisaient de sortir du campus pendant la journée scolaire.<sup>32</sup>

### **Autres**

Certains autres aspects de l'environnement alimentaire sont parfois abordés dans les politiques de nutrition en milieu scolaire, comme l'interdiction d'utiliser de la nourriture comme récompense ou punition,<sup>27,33</sup> la formulation de directives entourant les aliments offerts lors des célébrations,<sup>27</sup> l'encouragement à ne pas utiliser d'aliments lors des collectes de fonds<sup>27</sup> et la promotion d'une ambiance axée sur l'enfant à l'heure des repas.<sup>34</sup> La nomination d'un membre du personnel en tant que coordonnateur de ces aspects et de tous les autres aspects de l'alimentation à l'école, incluant les cafétérias, les machines distributrices et les cantines scolaires, est une autre sous-composante qui est parfois prise en compte.<sup>35</sup> Cette personne peut contribuer à réduire la fragmentation souvent observée<sup>36</sup> entre les divers services alimentaires, tout en veillant à ce que les élèves aient un accès suffisant, mais non excessif, à la nourriture. L'impact de ces diverses sous-composantes des politiques n'a pas encore été suffisamment étudié.

### **Éducation en santé**

#### **Éducation en nutrition**

L'éducation en nutrition s'inscrit dans le cadre de l'éducation en santé. Elle peut inclure les sujets suivants : préparation et consommation des aliments, acquisition de compétences en alimentation, facteurs qui influencent les choix et besoins alimentaires, aspects émotionnels et socioculturels de l'alimentation<sup>12</sup> et équilibre énergétique.<sup>7</sup> Nous n'avons pas trouvé de recherche traitant de l'enseignement des politiques de nutrition en milieu scolaire aux élèves. Autant Les écoles favorisant la santé (HPS) que l'IOM recommandent que la nutrition soit enseignée à tous les niveaux, tout au long de l'année scolaire, dans le cadre d'un programme d'enseignement fondé sur des données probantes qui vise une modification du comportement.<sup>7,12</sup> Les normes nutritionnelles peuvent être enseignées dans le cadre de l'éducation en santé ou d'autres matières; on peut même les enseigner ailleurs dans l'environnement scolaire (p. ex. information nutritionnelle offerte dans les cantines scolaires). Bien que l'enseignement de la nutrition puisse être intégré dans divers programmes; on lui consacre souvent trop peu de temps<sup>37</sup> pour qu'il puisse avoir un impact sur le comportement.<sup>20</sup>

Certaines évaluations d'interventions dans le cadre de l'éducation en nutrition indiquent que celles-ci peuvent favoriser la consommation d'aliments sains, surtout lorsqu'elles font partie d'interventions à multiples composantes et qu'elles sont axées sur le comportement.<sup>38</sup> De telles interventions ont toutefois moins tendance à entraîner des changements physiologiques, comme une diminution de l'indice de masse corporelle.<sup>7,39</sup> Des lignes directrices sur la conception d'interventions nutritionnelles efficaces à l'intention des jeunes existent déjà. De nouvelles recherches s'imposent pour évaluer jusqu'à quel point elles sont respectées.<sup>40</sup>

### **Qualifications du personnel**

La réussite de la mise en œuvre d'une politique globale de nutrition en milieu scolaire s'appuie sur la participation des membres du personnel de l'école, notamment des enseignants, des employés du service alimentaire et des membres de l'administration. Il est important d'offrir une formation continue aux enseignants, entre autres sur les méthodes de changement du comportement.<sup>7,12</sup> Une étude canadienne a révélé que les futurs enseignants étaient mal préparés à traiter de la nutrition dans les écoles. Cette étude recommandait l'inclusion de cours de nutrition obligatoires dans les programmes de formation des enseignants.<sup>41</sup> On offre peu de formation spécialisée aux États-Unis.<sup>37</sup> La formation offerte<sup>42</sup> porte davantage sur la mise en œuvre des programmes d'enseignement et les stratégies pouvant assurer leur durabilité.<sup>43</sup> Par ailleurs, les autres membres du personnel qui ont des responsabilités en matière de nutrition, comme les employés des services de santé, devraient également avoir les qualifications nécessaires et avoir accès à du perfectionnement professionnel.<sup>44</sup> Il est important d'évaluer jusqu'à quel point les membres du personnel de l'école sont préparés à adopter une stratégie intégrée de nutrition en milieu scolaire, de façon à pouvoir combler les lacunes, au besoin.

### **Services de santé et de consultation**

Les services de santé peuvent favoriser une saine alimentation en fournissant des informations sur l'accès aux aliments, en formulant des lignes directrices en matière d'alimentation, en élaborant des programmes alimentaires ou encore en contribuant à la détection de problèmes nutritionnels, en référant les personnes concernées et en assurant le suivi.<sup>12,45</sup> Par exemple, les fournisseurs de services de santé peuvent contribuer au dépistage et à la surveillance de certains problèmes d'ordre nutritionnel. Aux États-Unis, on effectue un dépistage à partir de l'indice de masse corporelle pour sensibiliser davantage les parents au poids de leurs enfants.<sup>46</sup> On ne dispose toutefois pas de données probantes suffisantes sur l'efficacité de tels programmes quant à la prévention de l'obésité. De nouvelles recherches s'imposent pour évaluer l'impact d'un tel dépistage et ses effets indésirables potentiels.<sup>47</sup> Bien que les programmes de traitement de l'obésité en milieu scolaire puissent être efficaces, il est souvent préférable d'avoir recours à des programmes communautaires pour prévenir les taquineries et l'embarras chez les élèves.<sup>48</sup> La *Nutrition-Friendly Schools Initiative* (NFSI) recommande que les services de santé offrent des services sur place ou mettent en place un système de référence relatif à la santé psychologique des élèves.<sup>49</sup> Les services de santé peuvent assurer le leadership de la mise en œuvre de mesures affirmatives visant à contrer l'intimidation, la stigmatisation et la discrimination en fonction des dimensions corporelles, de la forme du corps ou des

choix alimentaires. On ignore dans quelle mesure les écoles offrent des services de santé visant à favoriser une saine alimentation.

#### *Participation et sensibilisation des collectivités et des familles*

La participation des parents est souvent une composante importante des interventions en matière de santé en milieu scolaire.<sup>38</sup> Les HPS, la NFSI et l'OMS recommandent que les collectivités et les familles participent à l'élaboration et à la mise en œuvre des politiques de nutrition dans les écoles. Une équipe de santé en milieu scolaire formée de multiples partenaires, entre autres de parents et de membres de la collectivité, peut fournir des suggestions, et même défendre certains intérêts, tout au long du processus d'élaboration d'une telle politique.<sup>12</sup> Lors de l'examen de la documentation, nous avons relevé peu d'exemples de la participation de parents ou de membres de la collectivité aux politiques de nutrition en milieu scolaire.<sup>3,48</sup> De nouvelles recherches s'imposent pour préciser le rôle des collectivités et des parents dans l'avancement des politiques de nutrition en milieu scolaire ainsi que le rôle des écoles au niveau de la promotion de la santé dans l'ensemble de la collectivité.

#### **Lacunes sur le plan des connaissances et discussion**

Les administrations qui disposent de politiques de nutrition en milieu scolaire doivent décider comment elles peuvent se servir des recherches plutôt limitées disponibles à l'heure actuelle pour élaborer des politiques qui favorisent la santé des élèves et l'atteinte des objectifs d'apprentissage. Elles ont aussi un rôle à jouer dans l'obtention de données probantes entourant chacune des composantes essentielles des politiques et leurs fonctions respectives. Elles doivent en outre s'assurer que les politiques ne portent pas préjudice aux élèves.

Malgré l'insuffisance de données probantes, les politiques intégrées qui incluent les cinq composantes mentionnées dans le présent article s'inscrivent dans le cadre des approches coordonnées, intégrées et à composantes multiples qui sont actuellement recommandées pour améliorer la santé des jeunes.<sup>4,7,39,49</sup> De telles politiques peuvent transmettre aux élèves un message cohérent, provenant de multiples sources (p. ex. services alimentaires, salles de classe, services de santé), qui favorise la santé. Ce message peut être transmis aussi bien par l'exemple que par l'enseignement. Ces politiques peuvent faire le lien entre les écoles, les familles et les collectivités en matière de nutrition et servir en outre de cadre de responsabilisation.

Le paysage politique diversifié des provinces et territoires du Canada offre l'occasion de combler les lacunes actuelles en matière de données probantes. Une synthèse des politiques provinciales en vigueur a révélé que toutes ces politiques comportaient des normes nutritionnelles. Quelques politiques seulement incluaient d'autres composantes stratégiques, mais aucune d'entre elles n'incluait les cinq composantes à la fois.<sup>50</sup> Par ailleurs, ces politiques variaient en termes de rigueur et de champ d'application.<sup>50</sup> Une telle situation offre l'occasion aux administrations d'évaluer les impacts spécifiques de chacune des composantes, de la rigueur et du champ d'application des politiques sur la mise en œuvre et les résultats. Voici les principales questions à se poser : Quel rapport existe-t-il entre le type de politique et les ressources attribuées pour la mise en œuvre et l'évaluation, s'il y a lieu ? Comment le type de politique de nutrition influence-t-il les perceptions des élèves à l'égard des aliments, de la nutrition, de l'alimentation et de la santé ? Quelles sont les conséquences non prévues

des politiques, s'il y a lieu ? Compte tenu qu'aucune politique canadienne n'est considérée exhaustive à l'heure actuelle, deux questions demeurent en suspens : Quels facteurs influencent l'élaboration de politiques intégrées ?, et Quel est l'impact de ces facteurs sur la mise en œuvre et les résultats des politiques ?

#### **CONCLUSION**

Les préoccupations entourant la hausse croissante du risque d'obésité et de maladies chroniques ont attiré l'attention sur la nutrition dans les écoles. Les politiques de nutrition en milieu scolaire s'inscrivent dans le cadre d'une vaste stratégie de l'AGSS qui va dans le sens des recommandations internationales à cet égard. Les politiques intégrées permettent de prendre en compte tous les aspects de l'alimentation dans les écoles, notamment les aliments disponibles, l'environnement alimentaire, l'éducation en santé, les services de santé et de consultation ainsi que la sensibilisation des familles et des collectivités. Les politiques de nutrition en milieu scolaire varient considérablement en fonction des provinces et territoires du Canada. Cette situation fournit l'occasion d'évaluer les effets de chacune des composantes de ces politiques sur leur mise en œuvre et leur impact. De nouvelles recherches pourraient permettre d'obtenir un meilleur aperçu de la situation.

#### **RÉFÉRENCES**

1. St. Leger, L., « Protocols and guidelines for health promoting schools », *Promot Educ*, 12(3-4), 2005, p. 145-147.
2. Story, M., K.M. Kaphingst, R. Robinson-O'Brien et K. Glanz, « Creating healthy food and eating environments: Policy and environmental approaches », *Annu Rev Public Health*, 29, 2008, p. 253-272.
3. Foster, G.D., S. Sherman, K.E. Borradaile, K.M. Grundy, S.S. Vander Veur, J. Nachmani et coll., « A policy-based school intervention to prevent overweight and obesity », *Pediatrics*, 121(4), 2008, p. e794-e802. Sur Internet : <http://pediatrics.aappublications.org/cgi/content/full/121/4/e794> (consulté le 5 août 2008).
4. Organisation mondiale de la Santé, « What is a Health Promoting School? », Genève, OMS, 2006. Sur Internet : [http://www.who.int/school\\_youth\\_health/gshi/hps/en/print.html](http://www.who.int/school_youth_health/gshi/hps/en/print.html) (consulté le 20 juin 2008).
5. Agence de la santé publique du Canada, « L'Approche globale de la santé en milieu scolaire », Ottawa, Ontario, ASPC, 2008. Sur Internet : [http://www.phac-aspc.gc.ca/dca-dea/7-18yrs-ans/sante\\_globale-fra.php](http://www.phac-aspc.gc.ca/dca-dea/7-18yrs-ans/sante_globale-fra.php) (consulté le 9 décembre 2008).
6. Organisation mondiale de la Santé, « Stratégie mondiale pour l'alimentation, l'exercice physique et la santé », 2004. Sur Internet : [http://apps.who.int/gb/ebwha/pdf\\_files/WHA57/A57\\_R17-fr.pdf](http://apps.who.int/gb/ebwha/pdf_files/WHA57/A57_R17-fr.pdf) (consulté le 20 juin 2008).
7. Institute of Medicine, *Preventing Childhood Obesity: Health in the Balance*, Washington, District fédéral de Columbia, National Academies Press, 2005.
8. Institute of Medicine, *Nutrition Standards for Foods in Schools: Leading the Way toward Healthier Youth*, Washington, District fédéral de Columbia, National Academies Press, 2007.
9. Vereecken, C.A., K. Bobelijn et L. Maes, « School food policy at primary and secondary schools in Belgium-Flanders: Does it influence young people's food habits? », *Eur J Clin Nutr*, 59, 2005, p. 271-277.
10. Wojcicki, J.M. et M.B. Heyman, « Healthier choices and increased participation in a middle school lunch program: Effects of nutrition policy changes in San Francisco », *Am J Public Health*, 96(9), 2006, p. 1542-1547.
11. Story, M., M.P. Snyder, J. Anliker, J.L. Weber, L. Cunningham-Sabo, E.J. Stone et coll., « Changes in the nutrient content of school lunches: Results from the Pathways study », *Prev Med*, 37(Suppl. 1), 2003, p. S35-S45.
12. Aldinger, C.E. et J.T. Jones, « Healthy Nutrition: An Essential Element of a Health-promoting School », Série d'information de l'OMS sur la santé à l'école, document 4, Genève, OMS, 1998.
13. Harper, C., L. Wood et C. Mitchell, « The Provision of School Food in 18 Countries. School Food Trust », 2008. Sur Internet : [http://www.school-foodtrust.org.uk/UploadDocs/Library/Documents/school\\_food\\_in18countries.pdf](http://www.school-foodtrust.org.uk/UploadDocs/Library/Documents/school_food_in18countries.pdf) (consulté le 7 mai 2009).
14. Ministère de l'Agriculture des États-Unis, « School Nutrition Dietary Assessment Study-III », vol. I: School Foodservice, School Food Environment, and Meals Offered and Served, 2007. Sur Internet : <http://www.fns.usda.gov/oane/MENU/Published/CNP/FILES/SNDIII-Vol1ExecSum.pdf> (consulté le 7 juillet 2008).
15. Bere, E., M.B. Veierød, S. Øivind, K.I. Klepp, « Free school fruit – sustained effect three years later », *Int J Behav Nutr Phys Act*, 19(4), 2007, p. 5. Sur Inter-

- net : <http://www.pubmedcentral.nih.gov/articlerender.fcgi?artid=1804281> (consulté le 18 juillet 2008).
16. Perry, C.L., D.B. Bishop, G.L. Taylor, M. Davis, M. Story et C. Gray, « A randomized school trial of environmental strategies to encourage fruit and vegetable consumption among children », *Health Educ Behav*, 31(1), 2004, p. 65-76.
  17. Ransome, K., J. Rusk, M.A. Yurkiw et C.J. Field, « A school milk promotion program increases milk consumption and improves the calcium and vitamin D intakes of elementary school students », *Can J Diet Pract Res*, 59(4), 1998, p. 70-75.
  18. Caiger, J., « Nutrient composition of children's lunches: The association between the school food environment, dietary intake and weight status of elementary school children [thèse] », Charlottetown, Île-du-Prince-Édouard, Université de l'Île-du-Prince-Édouard, 2009.
  19. Hay, D.I., « School food programs: A good choice for children? », *Perception*, 23(4), 2000. Sur Internet : <http://www.ccsd.ca/perception/234/sf.htm> (consulté le 15 février 2010).
  20. Story, M., K.M. Kaphingst et S. French, « The role of schools in obesity prevention », *Future of Children*, 16(1), 2006, p. 109-142.
  21. Vallianatos, M., R. Gottlieb et M.A. Haase, « Farm-to-school: Strategies for urban health, combating sprawl, and establishing a community food systems approach », *J Planning Ed Res*, 23, 2004, p. 414-423.
  22. Vartanian, L.R., M.B. Schwartz et K.D. Brownell, « Effects of soft drink consumption on nutrition and health: A systematic review and meta-analysis », *Am J Public Health*, 97(4), 2007, p. 667-675.
  23. Grimm, G.C., L. Harnack et M. Story, « Factors associated with soft drink consumption in school-aged children », *J Am Diet Assoc*, 104(8), 2004, p. 1244-1249.
  24. Alliance for a Healthier Generation, « Competitive Beverage Guidelines ». Sur Internet : <http://www.healthiergeneration.org/beverages/> (consulté le 4 août 2008).
  25. American Beverage Association, « School Beverage Guidelines Progress Report 2007-2008 », 2008. Sur Internet : <http://www.schoolbeverages.com/download.aspx?id=111> (consulté le 4 août 2009).
  26. Boissons rafraîchissantes, « Lignes directrices de l'industrie sur la vente des boissons dans les écoles », 2007. Sur Internet : <http://www.refreshments.ca/pdf/School%20guidelines%20RefCda%20website%20reload%20200705.pdf> (consulté le 4 août 2009).
  27. National Alliance for Nutrition and Activity, « Model Local School Wellness Policies on Physical Activity and Nutrition », 2005. Sur Internet : <http://www.opi.state.mt.us/pdf/schoolfood/NANAModel.pdf> (consulté le 4 août 2008).
  28. Swinburn, B., G. Sacks, T. Lobstein, N. Rigby, L.A. Baur, K.D. Brownell et coll., « The 'Sydney Principles' for reducing the commercial promotion of foods and beverages to children », *Public Health Nutr*, 11(9), 2008, p. 881-886.
  29. Institute of Medicine, *Food Marketing to Children and Youth: Threat or Opportunity?* Washington, District fédéral de Columbia, National Academies Press, 2006.
  30. French, S.A., M. Story, J.A. Fulkerson et P. Hannan, « An environmental intervention to promote lower-fat food choices in secondary schools: Outcomes of the TACOS study », *Am J Public Health*, 94(9), 2004, p. 1507-1512.
  31. Kipke, M.D., E. Iverson, D. Moore, C. Booker, V. Ruelas, A.L. Peters et coll., « Food and park environments: Neighborhood-level risks for childhood obesity in east Los Angeles », *J Adolesc Health*, 40(4), 2007, p. 325-333.
  32. Fox, S., A. Meinen, M. Pesik, M. Landis et P.L. Remington, « Competitive food initiatives in schools and overweight in children: A review of the evidence », *WJM*, 104(5), 2005, p. 38-43.
  33. Kubik, M.Y., L.A. Lytle et M. Story, « Schoolwide food practices are associated with body mass index in middle school students », *Arch Pediatr Adolesc Med*, 159(12), 2005, p. 1111-1114.
  34. Turner, S., B. Mayall et M. Mauthner, « One big rush: Dinner-time at school », *Health Educ J*, 54, 1995, p. 18-27.
  35. Ministère de la Santé du Royaume-Uni, « National Healthy Schools Program ». Sur Internet : <http://www.healthyschools.gov.uk/Themes/Default.aspx?theme=2> (consulté le 20 août 2008).
  36. General Accounting Office, « School Meal Programs: Competitive Foods are Widely Available and Generate Substantial Revenues for Schools », 2005. Sur Internet : <http://www.gao.gov/new.items/d05563.pdf> (consulté le 4 août 2008).
  37. Kann, L., S.K. Telljohann et S.F. Wooley, « Health education: Results from the School Health Policies and Programs Study 2006 », *J Sch Health*, 77(8), 2007, p. 408-434.
  38. Himes, J.H., K. Ring, J. Gittelsohn, L. Cunningham-Sabo, J. Weber, J. Thompson et coll., « Impact of the Pathways intervention on dietary intakes of American Indian schoolchildren », *Prev Med*, 37, 2003, p. S55-S61.
  39. Summerbell, C.D., E. Waters, L.D. Edmunds, S. Kelly, T. Brown, K.J. Campbell, « Interventions for preventing obesity in children », *Cochrane Database Syst Rev*, 20(3), 2005, CD001871.
  40. Hoelscher, D.M., A. Evans, G.S. Parcel et S.H. Kelder, « Designing effective nutrition interventions for adolescents », *J Am Diet Assoc*, 102(3 Suppl.), 2002, p. S52-S63.
  41. Rossiter, M., T. Glanville, J. Taylor et I. Blum, « School food practices of prospective teachers », *J Sch Health*, 77(10), 2007, p. 694-700.
  42. Caballero, B., T. Clay, S.M. Davis, B. Ethelbah, B. Holy Rock, T. Lohman et coll., « Pathways: A school-based, randomized controlled trial for the prevention of obesity in American Indian schoolchildren », *Am J Clin Nutr*, 78(5), 2003, p. 1030-1038.
  43. Hoelscher, D.M., H.A. Feldman, C.C. Johnson, L.A. Lytle, S.K. Osganian, G.S. Parcel et coll., « School-based health education programs can be maintained over time: Results from the CATCH Institutionalization study », *Prev Med*, 38, 2004, p. 594-606.
  44. O'Toole, T.P., S. Anderson, C. Miller et J. Guthrie, « Nutrition services and foods and beverages available at school: Results from the School Health Policies and Programs Study 2006 », *J Sch Health*, 77(8), 2007, p. 500-521.
  45. Wainwright, P., J. Thomas et M. Jones, « Health promotion and the role of the school nurse: A systematic review », *J Adv Nurs*, 32(5), 2000, p. 1083-1091.
  46. Justus, M.B., K.W. Ryan, J. Rockenbach, C. Katterapalli et P. Card-Higginson, « Lessons learned while implementing a legislated school policy: Body mass index assessments among Arkansas's public school students », *J Sch Health*, 77(10), 2007, p. 706-713.
  47. Nihiser, A.J., S.M. Lee, H. Wechsler, M. McKenna, E. Odom, C. Reinold et coll., « Body mass index measurement in schools », *J Sch Health*, 77(10), 2007, p. 651-671.
  48. American Dietetic Association, « Position of the American Dietetic Association: Individual-, family-, school-, and community-based interventions for pediatric overweight », *J Am Diet Assoc*, 106(6), 2006, p. 925-945.
  49. Organisation mondiale de la Santé, « Nutrition Friendly Schools Initiative: Part I, NFSI Framework », Genève, Organisation mondiale de la Santé, 2007.
  50. An overview of school nutrition policies in Canada. *Dietitians of Canada*, 2008 (sept.), p. 1-3. Sur Internet : [http://www.bitsandbytes.ca/resources/school\\_nutrition\\_policies\\_Sept\\_08.pdf](http://www.bitsandbytes.ca/resources/school_nutrition_policies_Sept_08.pdf) (consulté le 15 février 2010).
